## Deep Spinal Infection after Outpatient Epidural Injections for Pain: A Retrospective Sample Cohort Study Using a Claims Database in South Korea: Erratum

In the article beginning on page 925 in the June 2021 issue, the second point in the “What This Article Tells Us That Is New” section should read “... (1.0 infections per 10,000 injections)” rather than “... (1.0 infections per 100,000 injections)” as originally published.

We regret this error. The online version and PDF of the article have been corrected.

DOI: 10.1097/ALN.0000000000003964

### Reference

Lee C-S, Park YJ, Moon JY, Kim Y-C: Deep spinal infection after outpatient epidural injections for pain: A retrospective sample cohort study using a claims database in South Korea. *ANESTHESIOLOGY* 2021; 134:925–36
